# Supplementary material for: Retracted Article: Gm5820, an antisense RNA of FGF1, suppresses FGF1 expression at the posttranscriptional level to inactivate the ERK/STAT3 pathway and alleviates neuropathic pain in mice
Source: Royal Society of Chemistry journal article supplement (doi:10.1039/c9ra03791h), 2019-01-01
Supplement: c9ra03791h1.pdf [file c9ra03791h1.pdf]

## Supplementary materials

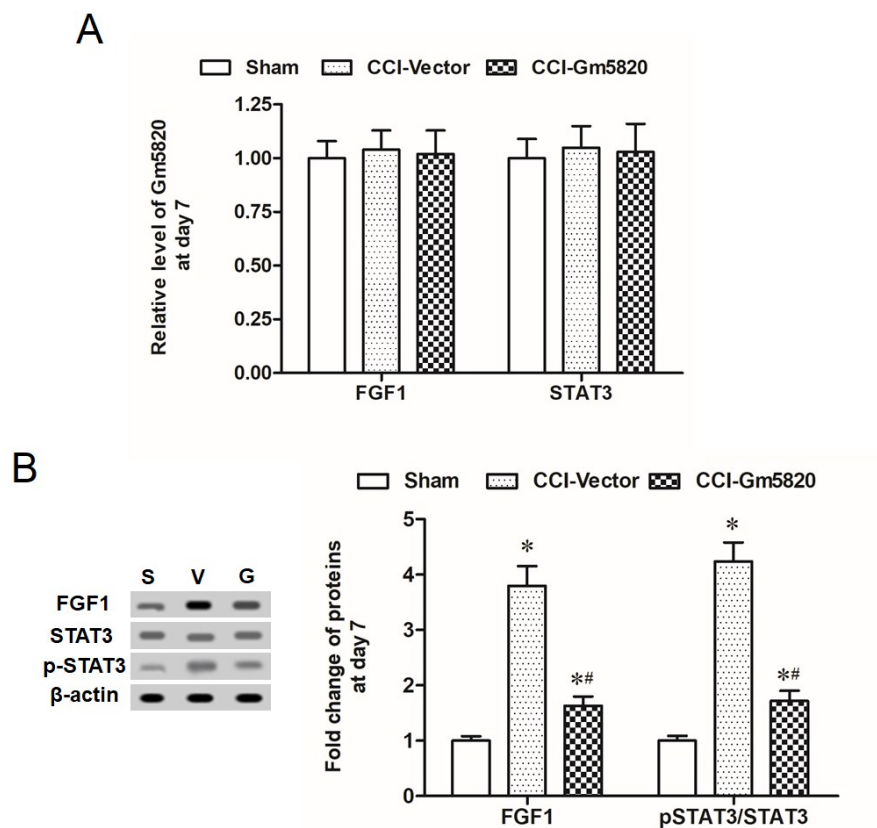

**Supplementary Fig 1. Intrathecal overexpression of Gm5820 suppressed FGF1 protein expression and phosphorylation of STAT3 in CCI mice.** A. Intrathecal injection of pcDNA-Gm5820 had no effect on mRNA of FGF1 and STAT3. B. Intrathecal overexpression of Gm5820 decreased FGF1 protein expression and phosphorylation of STAT3 in CCI mice. N = 15, \* $P < 0.05$  compared with Sham, # $P < 0.05$  compared with CCI-Vector.

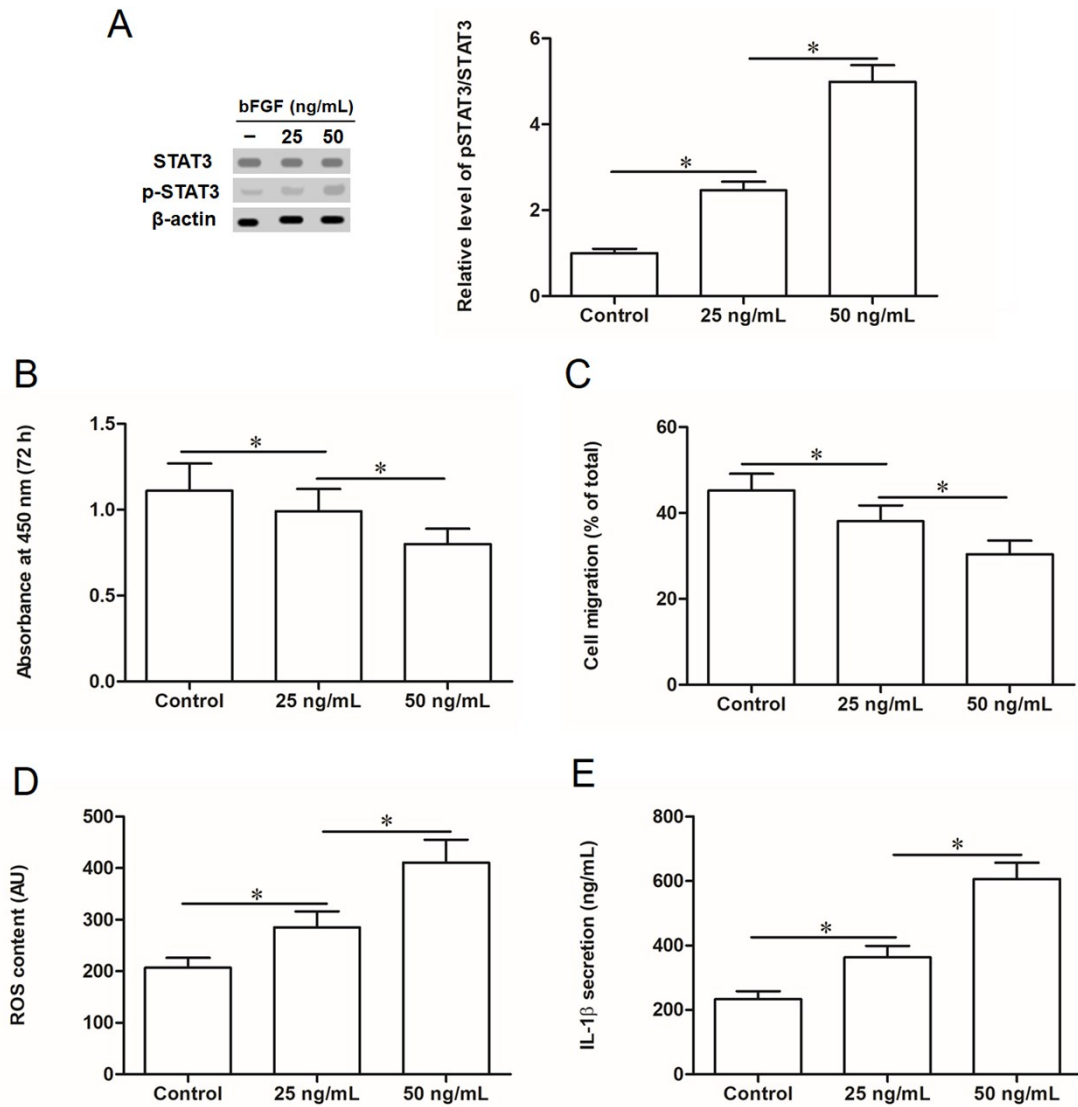

**Supplementary Fig 2. FGF1 stimulation activated STAT3 signaling and suppressed proliferation and migration in primary DRG neurons.** Primary DRG neurons were isolated from L4-L6 of 3 months old mouse and cultured in vitro. FGF1 with the concentrations of 0, 25 and 50 ng/mL were respectively used to incubate the cells. At 72 h post transfection, the cells of each group were harvested. A. The protein levels STAT3 and p-STAT3 were detected with Western blotting; B. CCK-8 assay was used to detect cell proliferation; C. Transwell Cell Migration assay was used to detect cell migration; D. ROS accumulation in the cells were detected with DCFH-DA ROS Assay kit; E. IL-1 $\beta$  contents in the supernatant were detected with IL-1 $\beta$  ELISA Kit. N = 5, \* $P$  < 0.05.

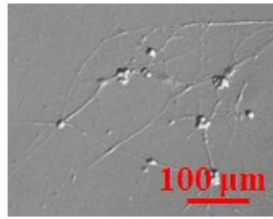

Supplementary image (for review only). Adherent DRG neurons at 72 h (naïve, 100×).
